# Supplementary material
Source: PubMed Central journal article supplement (PMC8409066)
Supplement: mmc1.pdf [file mmc1.pdf]

# THE LANCET

## Respiratory Medicine

### Supplementary appendix 1

This translation in French was submitted by the authors and we reproduce it as supplied. It has not been peer reviewed. *The Lancet's* editorial processes have only been applied to the original in English, which should serve as reference for this manuscript.

Cette traduction en français a été proposée par les auteurs et nous l'avons reproduite telle quelle. Elle n'a pas été examinée par des pairs. Les processus éditoriaux du *Lancet* n'ont été appliqués qu'à l'original en anglais et c'est cette version qui doit servir de référence pour ce manuscrit.

Supplement to: Marconi VC, Ramanan AV, de Bono S, et al. Efficacy and safety of baricitinib for the treatment of hospitalised adults with COVID-19 (COV-BARRIER): a randomised, double-blind, parallel-group, placebo-controlled phase 3 trial. *Lancet Respir Med* 2021; published online Sep 1. [http://dx.doi.org/10.1016/S2213-2600\(21\)00331-3](http://dx.doi.org/10.1016/S2213-2600(21)00331-3).

## Résumé

**Contexte** Le baricitinib est un inhibiteur sélectif oral de Janus kinase 1/2 avec des propriétés anti-inflammatoires connues. Cette étude évalue l'efficacité et l'innocuité du baricitinib en association avec les soins standards pour le traitement d'adultes hospitalisés atteints de COVID-19.

**Méthodes** Dans cet essai de phase 3, internationale, en double aveugle, randomisé et contrôlé par placebo, les participants ont été recrutés dans 101 centres répartis dans 12 pays d'Asie, d'Europe, d'Amérique du Nord et d'Amérique du Sud. Des adultes hospitalisés atteints de COVID-19 recevant des soins standards ont été répartis au hasard (1:1) pour recevoir du baricitinib une fois par jour (4 mg) ou un placebo apparié pendant 14 jours maximum. Les soins standards comprenaient les corticostéroïdes systémiques, tels que la dexaméthasone, et antiviraux, dont le remdésivir. Le critère d'évaluation principal composite était la proportion de personnes ayant progressé vers l'oxygène à haut débit, la ventilation non invasive, la ventilation mécanique invasive ou le décès au jour 28, évaluée dans la population en intention de traiter. La mortalité toutes causes confondues au jour 28 était un critère d'évaluation secondaire clé, et la mortalité toutes causes confondues au jour 60 était un critère d'évaluation exploratoire ; les deux ont été évaluées dans la population en intention de traiter. Les analyses d'innocuité ont été effectuées dans la population d'innocuité définie comme tous les participants répartis au hasard qui ont reçu au moins une dose du médicament à l'étude et qui n'ont pas été perdus de vue avant la première visite post-inclusion. Cette étude est enregistrée auprès de ClinicalTrials.gov (NCT04421027).

**Résultats** Entre le 11 juin 2020 et le 15 janvier 2021, 1525 participants ont été randomisés dans le groupe baricitinib (n=764) ou le groupe placebo (n=761). 1204 (79,3 %) des 1518 participants ayant des données disponibles recevaient des corticostéroïdes systémiques au départ, dont 1099 (91,3 %) étaient sous dexaméthasone; 287 (18,9 %) participants recevaient du remdésivir. Dans l'ensemble, 27,8 % des participants recevant du baricitinib et 30,5 % recevant le placebo ont progressé pour atteindre le critère d'évaluation principal (rapport de cotes 0,85 [IC à 95 % 0,67 à 1,08], p = 0,18), avec une différence de risque en points de pourcentage absolus de -2,7 (IC à 95 % -7,3 à 1,9). La mortalité toutes causes confondues à 28 jours était de 8 % (n=62) pour le baricitinib et de 13 % (n=100) pour le placebo (rapport de risques instantanés [HR] 0,57, IC à 95 % 0,41-0,78 ; p nominal = 0,0018), une réduction relative de 38,2 % de la mortalité; un décès supplémentaire a été évité pour 20 participants traités par baricitinib. La mortalité toutes causes confondues à 60 jours était de 10 % (n=79) pour le baricitinib et de 15 % (n=116) pour le placebo (HR 0,62, IC à 95 % 0,47-0,83 ; p = 0,0050). Les fréquences des événements indésirables graves (110 [15%] sur 750 dans le groupe baricitinib vs 135 [18%] sur 752 dans le groupe placebo), les infections graves (64 [9%] vs 74 [10%]), et les événements thromboemboliques veineux (20 [3 %] vs 19 [3 %]) étaient similaires entre les deux groupes.

**Interprétation** Bien qu'il n'y ait pas eu de réduction significative de la fréquence de progression de la maladie dans l'ensemble, le traitement par baricitinib combinés aux soins standards (y compris la dexaméthasone) a eu un profil d'innocuité similaire à celui des soins standards seuls, et a été associé à une réduction de la mortalité chez les participants adultes hospitalisés atteints de COVID-19.

**Financement** Eli Lilly and Company
