# Supplementary material
Source: PubMed Central journal article supplement (PMC8409066)
Supplement: mmc2.pdf [file mmc2.pdf]

# THE LANCET

## Respiratory Medicine

### Supplementary appendix 2

This translation in Japanese was submitted by the authors and we reproduce it as supplied. It has not been peer reviewed. *The Lancet's* editorial processes have only been applied to the original in English, which should serve as reference for this manuscript.

この日本語による翻訳文書は、著者本人により提出されたものを当方で複製したものです。本訳文の内容は査読を経ておらず、『ランセット』誌による編集も、本訳文のもとになる英語原文に対してのみ行われていることをご了承ください。

Supplement to: Marconi VC, Ramanan AV, de Bono S, et al. Efficacy and safety of baricitinib for the treatment of hospitalised adults with COVID-19 (COV-BARRIER): a randomised, double-blind, parallel-group, placebo-controlled phase 3 trial. *Lancet Respir Med* 2021; published online Sep 1. [http://dx.doi.org/10.1016/S2213-2600\(21\)00331-3](http://dx.doi.org/10.1016/S2213-2600(21)00331-3).

**背景** バリシチニブは、抗炎症作用を持つ既知の経口選択的ヤヌスキナーゼ 1/2 阻害剤である。この研究では、成人 COVID-19 入院患者の標準治療と組み合わせたバリシチニブ治療の有効性と安全性を評価した。

**方法** この国際共同二重盲検ランダム化プラセボ対照第三相試験では、アジア、ヨーロッパ、北アメリカ、南アメリカの 12 か国の 101 の施設から被験者が登録された。標準治療を受けている COVID-19 の成人入院患者は、1 日 1 回のバリシチニブ (4 mg) または対応するプラセボを最大 14 日間投与するようにランダムに割付けられた (1:1)。標準治療として、デキサメタゾンのような全身性コルチコステロイド、またレムデシビル等の抗ウイルス薬が含まれていた。複合的な主要評価項目は、ITT 集団で評価された、高流量酸素投与、非侵襲的もしくは侵襲的人工呼吸管理、または 28 日目までの死亡に進行した割合であった。28 日目までのすべての原因による死亡率は主要な副次的評価項目であり、60 日目までのすべての原因による死亡率は探索的評価項目であった。いずれも、ITT 集団で評価された。安全性解析は、少なくとも 1 回治験薬の投与を受け、ベースライン後最初の評価時点まで追跡可能であったランダム割付を受けたすべての参加者として定義した安全性評価集団で行った。この研究は ClinicalTrials.gov (NCT04421027) に登録されている。

**結果** 2020 年 6 月 11 日から 2021 年 1 月 15 日までの間に、1525 人の被験者がバリシチニブ群 (n=764) またはプラセボ群 (n=761) にランダムに割付けられた。データを入手した 1518 人の被験者のうち 1294 人 (79・3%) はベースラインで全身性コルチコステロイドを投与され、そのうち 1099 人 (91・3%) はデキサメタゾンであった。また、287 人 (18・9%) はレムデシビルを投与された。全体として、主要評価項目である病状の進行に合致した患者は、バリシチニブを投与された被験者では 27・8%、プラセボを投与された被験者では 30・5%であった (オッズ比 0・85 [95%CI 0・67 から 1・08]、p=0・18、絶対的パーセンテージポイントリスク差は-2.7 (95%CI -7・3 から 1・9))。28 日間の全死因死亡率はバリシチニブで 8% (n=62)、プラセボで 13% (n=100) であった (ハザード比 [HR] 0・57、95%CI 0・41-0・78; 名目 p=0・0018)、死亡率は 38・2%の相対的減少、すなわちバリシチニブ治療を受けた被験者 20 人あたり 1 人の死亡が予防された。60 日間の全死因死亡率はバリシチニブで 10% (n=79)、プラセボで 15% (n=116) であった (HR 0・62、95%CI 0・47-0・83; p=0・0050)。重篤な有害事象の頻度 (バリシチニブ群 750 人中 110 件 [15%] 対 プラセボ群 752 人中 135 件 [18%])、重篤な感染症 (64 件 [9%] 対 74 件 [10%])、および静脈血栓塞栓性イベント (20 件 [3%] 対 19 件 [3%]) は 2 つのグループ間で類似していた。

**解釈** 全体として病状の進行割合に有意な減少はみとめられなかったが、標準治療 (デキサメタゾンを含む) に追加されたバリシチニブによる治療は、標準治療単独と同様の安全性プロファイルを示し、成人 COVID-19 入院患者の死亡率の低下と関連していた。

イーライリリーアンドカンパニーへの資金提供。
