# Supplementary material
Source: PubMed Central journal article supplement (PMC8409066)
Supplement: mmc3.pdf [file mmc3.pdf]

# THE LANCET

## Respiratory Medicine

### Supplementary appendix 3

This translation in Portuguese was submitted by the authors and we reproduce it as supplied. It has not been peer reviewed. The Lancet's editorial processes have only been applied to the original in English, which should serve as reference for this manuscript.

Esta tradução em português foi submetida pelos autores e nós não fizemos quaisquer alterações. Esta versão não foi revista por pares. O processo editorial do *The Lancet* só foi aplicado à versão original em inglês, que deve servir como referência para este artigo.

Supplement to: Marconi VC, Ramanan AV, de Bono S, et al. Efficacy and safety of baricitinib for the treatment of hospitalised adults with COVID-19 (COV-BARRIER): a randomised, double-blind, parallel-group, placebo-controlled phase 3 trial. *Lancet Respir Med* 2021; published online Sep 1. [http://dx.doi.org/10.1016/S2213-2600\(21\)00331-3](http://dx.doi.org/10.1016/S2213-2600(21)00331-3).

## Resumo

**Antecedentes** Baricitinib é um inibidor seletivo oral da Janus quinase 1/2 com propriedades anti-inflamatórias conhecidas. Este estudo avalia a eficácia e segurança do baricitinib em combinação com o tratamento padrão para o tratamento de adultos hospitalizados com COVID-19.

**Métodos** Neste ensaio clínico global de fase 3, em dupla ocultação randomizado e controlado por placebo, os participantes foram recrutados em 101 centros em 12 países da Ásia, Europa, América do Norte e América do Sul. Adultos hospitalizados com COVID-19 recebendo tratamento padrão foram alocados aleatoriamente (1: 1) para receber baricitinib uma vez ao dia (4 mg) ou placebo até 14 dias. O tratamento padrão incluiu corticosteroides sistêmicos tais como dexametasona e antivirais, incluindo remdesivir. O endpoint primário composto foi a proporção que progrediu para oxigênio de alto débito, ventilação não invasiva, ventilação mecânica invasiva ou morte no dia 28, avaliada na população com intenção de tratar. A mortalidade por todas as causas no dia 28 foi um endpoint secundário chave e a mortalidade por todas as causas no dia 60 foi um endpoint exploratório; ambos foram avaliados na população com intenção de tratar. As análises de segurança foram feitas na população de segurança definida como todos os participantes alocados aleatoriamente que receberam pelo menos uma dose do medicamento do estudo e que não foram perdidos para acompanhamento antes da primeira visita pós-linha de base. Este estudo está registrado com ClinicalTrials.gov (NCT04421027).

**Resultados** Entre 11 de junho de 2020 e 15 de janeiro de 2021, 1.525 participantes foram aleatoriamente alocados para o grupo do baricitinib (n = 764) ou o grupo do placebo (n = 761). De 1518 participantes com dados disponíveis, 1204 (79,3%) estavam a tomar corticosteroides sistêmicos na linha de base e destes, 1099 (91,3%) estavam a tomar dexametasona; 287 (18,9%) participantes estavam a tomar remdesivir. Globalmente, 27,8% dos participantes que receberam baricitinib e 30,5% que receberam placebo progrediram para atingir o endpoint primário (odds ratio 0,85 [IC de 95% 0,67 a 1,88]; p = 0,18), com uma diferença de risco absoluto de -2,7% (IC 95% -7,3 a 1,9). A mortalidade por todas as causas aos 28 dias foi de 8% (n = 62) para o baricitinib e 13% (n = 100) para o placebo (Hazard Ratio [HR] 0,57, IC 95% 0,41–0,78; nominal p = 0,018), uma redução relativa de 38,2% na mortalidade; uma morte adicional foi evitada por 20 participantes tratados com baricitinib. A mortalidade por todas as causas aos 60 dias foi de 10% (n = 79) para o baricitinib e 15% (n = 116) para o placebo (HR 0,62, IC de 95% 0,47–0,83; p = 0,0050). As frequências de eventos adversos graves (110 [15%] de 750 no grupo baricitinib vs 135 [18%] de 752 no grupo placebo), infecções graves (64 [9%] vs 74 [10%]), e eventos tromboembólicos venosos (20 [3%] vs 19 [3%]) foram semelhantes entre os dois grupos.

**Interpretação** Embora não tenha havido redução significativa na frequência de progressão da doença, o tratamento com baricitinib além do tratamento padrão (incluindo dexametasona) teve um perfil de segurança semelhante ao do tratamento padrão e foi associado a redução da mortalidade em doentes adultos hospitalizados por COVID-19.

**Financiado** por Eli Lilly and Company
