# Supplementary material
Source: PubMed Central journal article supplement (PMC8409066)
Supplement: mmc4.pdf [file mmc4.pdf]

# THE LANCET

## Respiratory Medicine

### Supplementary appendix 4

This translation in Russian was submitted by the authors and we reproduce it as supplied. It has not been peer reviewed. *The Lancet's* editorial processes have only been applied to the original in English, which should serve as reference for this manuscript.

Этот перевод на русский язык был предоставлен авторами, и мы воспроизводим его в том виде, в котором он был предоставлен. Этот перевод не был рецензирован. Редакционные процессы журнала *The Lancet* были применены только к оригиналу на английском языке, который служит отсылкой для этой статьи.

Supplement to: Marconi VC, Ramanan AV, de Bono S, et al. Efficacy and safety of baricitinib for the treatment of hospitalised adults with COVID-19 (COV-BARRIER): a randomised, double-blind, parallel-group, placebo-controlled phase 3 trial. *Lancet Respir Med* 2021; published online Sep 1. [http://dx.doi.org/10.1016/S2213-2600\(21\)00331-3](http://dx.doi.org/10.1016/S2213-2600(21)00331-3).

## Резюме

**Предпосылки.** Барицитиниб представляет собой селективный ингибитор янус-киназы 1/2 типа для перорального применения с известными противовоспалительными свойствами. В данном исследовании оценивались эффективность и безопасность барицитиниба в сочетании со стандартными методами лечения госпитализированных взрослых пациентов с COVID-19.

**Методы.** В этом глобальном двойном слепом рандомизированном плацебо-контролируемом исследовании 3 фазы приняли участие пациенты из 101 центра в 12 странах Азии, Европы, Северной Америки и Южной Америки. Госпитализированные взрослые с COVID-19, получающие стандартную терапию, были случайным образом распределены (1: 1) для приема барицитиниба (4 мг) один раз в день или соответствующего плацебо на срок до 14 дней. Стандарт лечения включал системные кортикостероиды, такие как дексаметазон и противовирусные препараты, включая ремдесивир. Составной первичной конечной точкой была доля пациентов, которые прогрессировали до высокопоточной оксигенотерапии, неинвазивной вентиляции, инвазивной механической вентиляции или смерти к 28 дню, оцениваемая в популяции ИТТ. Смертность от всех причин к 28 дню была ключевой вторичной конечной точкой, а смертность от всех причин к 60 дню была исследовательской конечной точкой; оба показателя были оценены в популяции ИТТ. Анализ безопасности проводился в популяции, определяемой как все случайно распределенные участники, которые получили по крайней мере одну дозу исследуемого препарата и которые не были потеряны для наблюдения до первого визита после исходного уровня. Это исследование зарегистрировано на сайте ClinicalTrials.gov (NCT04421027).

**Результаты.** В период с 11 июня 2020 г. по 15 января 2021 г. 1525 участников были случайным образом распределены в группу барицитиниба (n = 764) или группу плацебо (n = 761). 1204 (79,3%) из 1518 участников с доступными данными исходно получали кортикостероиды, из них 1099 (91,3%) - дексаметазон; 287 (18,9%) участников получали ремдесивир. В итоге, 27,8% участников, получавших барицитиниб, и 30,5% участников, получавших плацебо имели прогрессирование заболевания, т.е. достигли основной конечной точки (отношение шансов 0,85 [95% ДИ 0,067–1,08], p = 0,18), при этом абсолютная разница рисков в процентах составляет –2,7 (95% ДИ –7,3–1,9). Смертность в течение 28 дней от всех причин составила 8% (n = 62) в группе барицитиниба и 13% (n = 100) в группе плацебо (отношение рисков [ОР] 0,57, 95% ДИ 0,41-0,78; номинальное p = 0,0018); относительное снижение смертности на 38,2%. Таким образом, одна дополнительная смерть была предотвращена на 20 участников, получавших барицитиниб. Смертность от всех причин в течение 60 дней составила 10% (n = 79) для барицитиниба и 15% (n = 116) для плацебо (HR 0,62, 95% ДИ 0,47-0,83; p = 0,0050). Частота серьезных нежелательных явлений (110 [15%] из 750 в группе барицитиниба против 135 [18,0%] из 752 в группе плацебо), серьезных инфекций (64 [9%] против 74 [10%]), и явлений венозной тромбоэмболии (20 [3%] против 19 [3%]) были одинаковыми в обеих группах.

**Интерпретация.** Хотя не наблюдалось значительного снижения частоты прогрессирования заболевания в целом, лечение барицитинибом в дополнение к стандартной терапии (включая дексаметазон) имело профиль безопасности, аналогичный профилю безопасности стандартного лечения, и было связано со снижением смертности среди госпитализированных взрослых пациентов с COVID-9.

**Финансирование.** Eli Lilly and Company.
