# Supplementary material
Source: PubMed Central journal article supplement (PMC8409066)
Supplement: mmc5.pdf [file mmc5.pdf]

# THE LANCET

## Respiratory Medicine

### Supplementary appendix 5

This translation in Spanish was submitted by the authors and we reproduce it as supplied. It has not been peer reviewed. *The Lancet's* editorial processes have only been applied to the original in English, which should serve as reference for this manuscript.

Los autores nos proporcionaron esta traducción al español y la reproducimos tal como nos fue entregada. No la hemos revisado. Los procesos editoriales de *The Lancet* se han aplicado únicamente al original en inglés, que debe servir de referencia para este manuscrito.

Supplement to: Marconi VC, Ramanan AV, de Bono S, et al. Efficacy and safety of baricitinib for the treatment of hospitalised adults with COVID-19 (COV-BARRIER): a randomised, double-blind, parallel-group, placebo-controlled phase 3 trial. *Lancet Respir Med* 2021; published online Sep 1. [http://dx.doi.org/10.1016/S2213-2600\(21\)00331-3](http://dx.doi.org/10.1016/S2213-2600(21)00331-3).

## Resumen

**Antecedentes** El baricitinib es un inhibidor oral y selectivo de la Janus quinasa 1/2 con conocidas propiedades inmunomoduladoras. Este estudio evalúa la eficacia y seguridad de baricitinib en combinación con el estándar de tratamiento para adultos hospitalizados con COVID-19.

**Métodos** En este ensayo de fase 3, global, doble ciego, aleatorizado y controlado frente placebo, se inscribieron 101 centros en 12 países incluyendo Asia, Europa, América del Norte y América del Sur. Los pacientes con COVID-19 que recibían tratamiento estándar se asignaron al azar (1:1) para recibir baricitinib (4 mg) una vez al día o placebo durante un máximo de 14 días. El tratamiento estándar incluyó corticosteroides sistémicos como dexametasona y antivirales como remdesivir. El objetivo primario fue la proporción de pacientes que progresó a oxígeno de alto flujo, ventilación no invasiva, ventilación mecánica invasiva o muerte al día 28 (población por intención de tratar). La mortalidad por todas las causas al día 28 fue un objetivo secundario clave, y la mortalidad por todas las causas al día 60 fue un objetivo exploratorio (población por intención de tratar). Los análisis de seguridad se realizaron en la población de seguridad definida como todos los participantes asignados al azar que recibieron al menos una dosis del fármaco del estudio y que no se perdieron durante el seguimiento antes de la primera visita posterior al inicio. Este estudio está registrado en ClinicalTrials.gov (NCT04421027).

**Resultados** Entre el 11 de junio de 2020 y el 15 de enero de 2021, se asignaron al azar 1525 participantes al grupo de baricitinib (n=764) o al grupo de placebo (n=761). 1204 pacientes (79.3%) de los 1518 pacientes con datos disponibles recibían corticoides sistémicos, de los cuales 1099 (91.3%) tomaban dexametasona; 287 (18.9%) recibían remdesivir. En general, el 27,8% de los participantes que recibieron baricitinib y el 30,5% que recibieron placebo alcanzaron el objetivo primario - razón de posibilidades 0,85 [IC del 95%: 0,67 a 1,08], p=0,18), con una diferencia de riesgo en porcentajes absolutos de -2,7 (IC del 95%: -7,3 a 1,9). La mortalidad por todas las causas al día 28 fue del 8% (n=62) para baricitinib y del 13% (n=100) para placebo (índice de riesgo [HR] 0,57, IC del 95% 0,41-0,78; nominal p=0,0018), lo que supone un 38,2% de reducción relativa en la mortalidad; se evitó una muerte adicional por cada 20 participantes tratados con baricitinib. La mortalidad por todas las causas al día 60 fue del 10% (n=79) para baricitinib y del 15% (n=116) para placebo (HR 0,62, IC del 95%: 0,47-0,83; p = 0,0050). La frecuencia de eventos adversos graves fue 110 [15%] de 750 en el grupo de baricitinib frente a 135 [18%] de 752 en el grupo de placebo entre ellos infecciones graves (64 [9%] frente a 74 [10%]) y episodios tromboembólicos venosos (20 [3%] frente a 19 [3%]) que fueron similares entre los dos grupos.

**Conclusiones** Aunque no hubo una reducción significativa en la frecuencia de progresión de la enfermedad según el objetivo primario del estudio, el tratamiento con baricitinib (y tratamiento estándar con dexametasona) tuvo un perfil de seguridad similar al de tratamiento estándar frente a placebo y se asoció con una reducción significativa de la mortalidad en pacientes adultos con COVID-19 hospitalizados.

**Financiamiento** de Eli Lilly and Company
